# Supplementary material for: Comparative Genomics and Phenotypic Characterization of Gluconacetobacter entanii, a Highly Acetic Acid-Tolerant Bacterium from Vinegars
Source: MDPI journal article supplement (doi:10.3390/foods12010214), 2023-01-03
Supplement: s1 [file s1]

**Table S1.** The overall genome similarities (%) between *G. entanii* strains calculated by orthologous average nucleotide identity algorithm (OrthoANI).

|                          | <i>G. entanii</i> AV429 | <i>G. entanii</i> FXV2 | <i>G. entanii</i> KS542 | <i>G. entanii</i> KS544 | <i>G. entanii</i> KS545 | <i>G. entanii</i> SI2084 |
|--------------------------|-------------------------|------------------------|-------------------------|-------------------------|-------------------------|--------------------------|
| <i>G. entanii</i> AV429  | /                       | 98.60                  | 98.34                   | 98.31                   | 98.32                   | 98.33                    |
| <i>G. entanii</i> FXV2   | 98.60                   | /                      | 98.50                   | 98.51                   | 98.52                   | 98.48                    |
| <i>G. entanii</i> KS542  | 98.34                   | 98.50                  | /                       | 100.00                  | 99.99                   | 99.99                    |
| <i>G. entanii</i> KS544  | 98.31                   | 98.51                  | 100.00                  | /                       | 99.99                   | 99.98                    |
| <i>G. entanii</i> KS545  | 98.32                   | 98.52                  | 99.99                   | 99.99                   | /                       | 99.99                    |
| <i>G. entanii</i> SI2084 | 98.33                   | 98.48                  | 99.99                   | 99.98                   | 99.99                   | /                        |

**Table S2.** *In silico* DNA-DNA hybridization analysis between genomes of *G. entanii* strains. The similarities were calculated by the Genome-to-Genome Distance Calculator 2.1.

|                          | <i>G. entanii</i> AV429 (%) | <i>G. entanii</i> SI2084 (%) | <i>G. entanii</i> KS545 (%) | <i>G. entanii</i> KS544 (%) | <i>G. entanii</i> KS542 (%) | <i>G. entanii</i> FXV2 (%) |
|--------------------------|-----------------------------|------------------------------|-----------------------------|-----------------------------|-----------------------------|----------------------------|
| <i>G. entanii</i> AV429  | 100.0                       |                              |                             |                             |                             |                            |
| <i>G. entanii</i> SI2084 | 77.5                        | 100.0                        |                             |                             |                             |                            |
| <i>G. entanii</i> KS545  | 77.8                        | 99.7                         | 100.0                       |                             |                             |                            |
| <i>G. entanii</i> KS544  | 77.6                        | 99.9                         | 99.9                        | 100.0                       |                             |                            |
| <i>G. entanii</i> KS542  | 77.7                        | 99.9                         | 99.9                        | 100.0                       | 100.0                       |                            |
| <i>G. entanii</i> FXV2   | 88.4                        | 78.9                         | 78.3                        | 79.2                        | 79.2                        | 100.0                      |

**Table S3.** Distribution of different Rep proteins from *Novacetimonas*, *Komagataeibacter*, and *Acetobacter* plasmids in genomes of *Gluconacetobacter entanii* strains.

| Plasmid (Acc. No.) | Rep protein (Acc. No.) | <i>G. entanii</i> LTH4560 <sup>T</sup> | <i>G. entanii</i> AV429 | <i>G. entanii</i> SI2084 | <i>G. entanii</i> FXV2 |
|--------------------|------------------------|----------------------------------------|-------------------------|--------------------------|------------------------|
| CP062148           | QOF96883.1             | +                                      | +                       | +                        | -                      |
| AJ223503           | CAA11421.1             | +                                      | +                       | -                        | -                      |
| AP012160           | BAK85968.1             | +                                      | +                       | +                        | +                      |
| AP012161           | BAK85224.1             | +                                      | +                       | +                        | -                      |
| AP012162           | BAK85302.1             | +                                      | +                       | +                        | +                      |
| CP019877           | AQU89268.1             | +                                      | +                       | +                        | -                      |
| CP019878           | AQU89325.1             | +                                      | +                       | +                        | +                      |
| CP019879           | AQU89344.1             | +                                      | +                       | +                        | +                      |
| CP023037           | AXY23809.1             | -                                      | -                       | +                        | -                      |
| CP023038 (type 1)  | AXY24020.1             | -                                      | -                       | +                        | -                      |
| CP023038 (type 2)  | AXY24036.1             | +                                      | -                       | -                        | -                      |
| CP023039           | AXY24109.1             | +                                      | -                       | -                        | -                      |
| CP023040           | AXY24276.1             | +                                      | -                       | -                        | -                      |
| CM018731           | KAB8122177.1           | +                                      | -                       | -                        | -                      |
| LT575494           | SAY50089.1             | -                                      | -                       | +                        | -                      |
| CP004361           | AHI27136.1             | +                                      | -                       | -                        | -                      |
| CP004362           | AHI27138.1             | +                                      | +                       | -                        | -                      |
| CP004363           | AHI27167.1             | +                                      | -                       | -                        | -                      |
| CP004364           | AHI27256.1             | +                                      | +                       | +                        | +                      |
| CP039845           | QHM90155.1             | -                                      | -                       | -                        | -                      |
| LN606601           | CEF43042.1             | +                                      | +                       | +                        | +                      |
| CP043507 (type 1)  | QEO18808.1             | +                                      | -                       | -                        | -                      |
| CP011123           | ANA15375.1             | +                                      | +                       | +                        | +                      |
| LN609303 (type 1)  | CEF57342.1             | +                                      | -                       | -                        | -                      |
| LN609304           | CEF57494.1             | +                                      | +                       | +                        | +                      |
| AP018516 (type 1)  | BBC81753.1             | +                                      | -                       | -                        | -                      |
| CP014688           | AQT06463.1             | +                                      | -                       | -                        | -                      |
| CP030873           | AXC27928.1             | +                                      | +                       | +                        | +                      |
| CP023190           | AXN01876.1             | +                                      | -                       | -                        | -                      |
| AP023412           | BCK77757.1             | +                                      | +                       | +                        | +                      |

|                     |            |    |    |    |    |
|---------------------|------------|----|----|----|----|
| CP021925            | ASC07527.1 | +  | +  | +  | +  |
| CP015169 (type 1)   | AOW50630.1 | +  | +  | +  | +  |
| AP011122 (type 1)   | BAI00816.1 | +  | -  | -  | -  |
| AP011124            | BAI01161.1 | +  | +  | +  | +  |
| AP014882 (type 1)   | BAU39745.1 | +  | -  | -  | -  |
| AP014885            | BAU39956.1 | +  | -  | -  | -  |
| HF677572            | CCT61022.1 | +  | +  | +  | -  |
| HF677573            | CCT61029.1 | +  | +  | +  | +  |
| HF677576            | CCT61057.1 | +  | -  | -  | -  |
| Sum of Rep proteins |            | 35 | 20 | 21 | 14 |

**Table S4.** KOs overrepresented in the *G. entanii* species group when compared to all other *Novacetimonas* species. Values in the table correspond to median gene/KO copy number values.

| ID     | <i>G. entanii</i><br>(n=9) | <i>Novacetimonas</i><br>spp. (n=15) | difference | Definition                                                                                                           |
|--------|----------------------------|-------------------------------------|------------|----------------------------------------------------------------------------------------------------------------------|
| K03496 | 6                          | 2                                   | 4          | parA, soj; chromosome partitioning protein                                                                           |
| K00135 | 8                          | 5                                   | 3          | gabD; succinate-semialdehyde dehydrogenase / glutarate-semialdehyde dehydrogenase [EC:1.2.1.16<br>1.2.1.79 1.2.1.20] |
| K03497 | 6                          | 3                                   | 3          | parB, spo0J; ParB family transcriptional regulator, chromosome partitioning protein                                  |
| K03530 | 6                          | 3                                   | 3          | hupB; DNA-binding protein HU-beta                                                                                    |
| K01153 | 3                          | 1                                   | 2          | hsdR; type I restriction enzyme, R subunit [EC:3.1.21.3]                                                             |
| K04763 | 4                          | 2                                   | 2          | xerD; integrase/recombinase XerD                                                                                     |
| K18201 | 2                          | 0                                   | 2          | AGPHD1; hydroxylysine kinase [EC:2.7.1.81]                                                                           |
| K22616 | 2                          | 0                                   | 2          | olsC; ornithine lipid ester-linked acyl 2-hydroxylase [EC:1.14.11.58]                                                |
| K00064 | 1                          | 0                                   | 1          | E1.1.1.122; D-threo-aldose 1-dehydrogenase [EC:1.1.1.122]                                                            |
| K00077 | 2                          | 1                                   | 1          | panE, apbA; 2-dehydropantoate 2-reductase [EC:1.1.1.169]                                                             |
| K00111 | 2                          | 1                                   | 1          | glpA, glpD; glycerol-3-phosphate dehydrogenase [EC:1.1.5.3]                                                          |
| K00146 | 1                          | 0                                   | 1          | feaB, tynC; phenylacetaldehyde dehydrogenase [EC:1.2.1.39]                                                           |
| K00151 | 1                          | 0                                   | 1          | hpaE, hpcC; 5-carboxymethyl-2-hydroxymuconic-semialdehyde dehydrogenase [EC:1.2.1.60]                                |
| K00154 | 1                          | 0                                   | 1          | E1.2.1.68; coniferyl-aldehyde dehydrogenase [EC:1.2.1.68]                                                            |
| K00156 | 1                          | 0                                   | 1          | poxB; pyruvate dehydrogenase (quinone) [EC:1.2.5.1]                                                                  |

|        |   |   |   |                                                                                                     |
|--------|---|---|---|-----------------------------------------------------------------------------------------------------|
| K00330 | 2 | 1 | 1 | nuoA; NADH-quinone oxidoreductase subunit A [EC:7.1.1.2]                                            |
| K00331 | 2 | 1 | 1 | nuoB; NADH-quinone oxidoreductase subunit B [EC:7.1.1.2]                                            |
| K00334 | 2 | 1 | 1 | nuoE; NADH-quinone oxidoreductase subunit E [EC:7.1.1.2]                                            |
| K00335 | 2 | 1 | 1 | nuoF; NADH-quinone oxidoreductase subunit F [EC:7.1.1.2]                                            |
| K00336 | 2 | 1 | 1 | nuoG; NADH-quinone oxidoreductase subunit G [EC:7.1.1.2]                                            |
| K00337 | 2 | 1 | 1 | nuoH; NADH-quinone oxidoreductase subunit H [EC:7.1.1.2]                                            |
| K00339 | 2 | 1 | 1 | nuoJ; NADH-quinone oxidoreductase subunit J [EC:7.1.1.2]                                            |
| K00340 | 2 | 1 | 1 | nuoK; NADH-quinone oxidoreductase subunit K [EC:7.1.1.2]                                            |
| K00341 | 2 | 1 | 1 | nuoL; NADH-quinone oxidoreductase subunit L [EC:7.1.1.2]                                            |
| K00342 | 2 | 1 | 1 | nuoM; NADH-quinone oxidoreductase subunit M [EC:7.1.1.2]                                            |
| K00343 | 2 | 1 | 1 | nuoN; NADH-quinone oxidoreductase subunit N [EC:7.1.1.2]                                            |
| K00344 | 3 | 2 | 1 | qor, CRYZ; NADPH:quinone reductase [EC:1.6.5.5]                                                     |
| K00433 | 1 | 0 | 1 | cpo; non-heme chloroperoxidase [EC:1.11.1.10]                                                       |
| K00446 | 1 | 0 | 1 | dmpB, xylE; catechol 2,3-dioxygenase [EC:1.13.11.2]                                                 |
| K00483 | 1 | 0 | 1 | hpaB; 4-hydroxyphenylacetate 3-monooxygenase [EC:1.14.14.9]                                         |
| K00549 | 2 | 1 | 1 | metE; 5-methyltetrahydropteroyltriglutamate-homocysteine methyltransferase [EC:2.1.1.14]            |
| K00558 | 1 | 0 | 1 | DNMT1, dcm; DNA (cytosine-5)-methyltransferase 1 [EC:2.1.1.37]                                      |
| K00782 | 2 | 1 | 1 | lIdG; L-lactate dehydrogenase complex protein lIdG                                                  |
| K00839 | 2 | 1 | 1 | pucG; (S)-ureidoglycine---glyoxylate transaminase [EC:2.6.1.112]                                    |
| K00864 | 2 | 1 | 1 | glpK, GK; glycerol kinase [EC:2.7.1.30]                                                             |
| K01092 | 3 | 2 | 1 | E3.1.3.25, IMPA, suhB; myo-inositol-1(or 4)-monophosphatase [EC:3.1.3.25]                           |
| K01322 | 1 | 0 | 1 | PREP; prolyl oligopeptidase [EC:3.4.21.26]                                                          |
| K01568 | 2 | 1 | 1 | PDC, pdc; pyruvate decarboxylase [EC:4.1.1.1]                                                       |
| K01689 | 2 | 1 | 1 | ENO, eno; enolase [EC:4.2.1.11]                                                                     |
| K01703 | 2 | 1 | 1 | leuC, IPMI-L; 3-isopropylmalate/(R)-2-methylmalate dehydratase large subunit [EC:4.2.1.33 4.2.1.35] |
| K01826 | 1 | 0 | 1 | hpaF, hpcD; 5-carboxymethyl-2-hydroxymuconate isomerase [EC:5.3.3.10]                               |
| K01961 | 3 | 2 | 1 | accC; acetyl-CoA carboxylase, biotin carboxylase subunit [EC:6.4.1.2 6.3.4.14]                      |
| K01971 | 1 | 0 | 1 | ligD; bifunctional non-homologous end joining protein LigD [EC:6.5.1.1]                             |
| K02013 | 4 | 3 | 1 | ABC.FEV.A; iron complex transport system ATP-binding protein [EC:7.2.2.-]                           |
| K02015 | 4 | 3 | 1 | ABC.FEV.P; iron complex transport system permease protein                                           |
| K02016 | 4 | 3 | 1 | ABC.FEV.S; iron complex transport system substrate-binding protein                                  |
| K02160 | 3 | 2 | 1 | accB, bccP; acetyl-CoA carboxylase biotin carboxyl carrier protein                                  |

|        |   |   |   |                                                                                  |
|--------|---|---|---|----------------------------------------------------------------------------------|
| K02232 | 2 | 1 | 1 | cobQ, cbiP; adenosylcobyrinic acid synthase [EC:6.3.5.10]                        |
| K02274 | 2 | 1 | 1 | coxA, ctaD; cytochrome c oxidase subunit I [EC:7.1.1.9]                          |
| K02275 | 1 | 0 | 1 | coxB, ctaC; cytochrome c oxidase subunit II [EC:7.1.1.9]                         |
| K02276 | 1 | 0 | 1 | coxC, ctaE; cytochrome c oxidase subunit III [EC:7.1.1.9]                        |
| K02440 | 2 | 1 | 1 | GLPF; glycerol uptake facilitator protein                                        |
| K02509 | 1 | 0 | 1 | hpaH; 2-oxo-hept-3-ene-1,7-dioate hydratase [EC:4.2.1.-]                         |
| K02510 | 1 | 0 | 1 | hpaI, hpcH; 4-hydroxy-2-oxoheptanedioate aldolase [EC:4.1.2.52]                  |
| K03111 | 2 | 1 | 1 | ssb; single-strand DNA-binding protein                                           |
| K03299 | 5 | 4 | 1 | TC.GNTP; gluconate:H <sup>+</sup> symporter, GntP family                         |
| K03442 | 1 | 0 | 1 | mscS; small conductance mechanosensitive channel                                 |
| K03559 | 3 | 2 | 1 | exbD; biopolymer transport protein ExbD                                          |
| K03561 | 3 | 2 | 1 | exbB; biopolymer transport protein ExbB                                          |
| K03762 | 1 | 0 | 1 | proP; MFS transporter, MHS family, proline/betaine transporter                   |
| K03777 | 2 | 1 | 1 | dld; D-lactate dehydrogenase (quinone) [EC:1.1.5.12]                             |
| K03832 | 3 | 2 | 1 | tonB; periplasmic protein TonB                                                   |
| K04047 | 1 | 0 | 1 | dps; starvation-inducible DNA-binding protein                                    |
| K05343 | 1 | 0 | 1 | treS; maltose alpha-D-glucosyltransferase / alpha-amylase [EC:5.4.99.16 3.2.1.1] |
| K05349 | 3 | 2 | 1 | bgIX; beta-glucosidase [EC:3.2.1.21]                                             |
| K05595 | 2 | 1 | 1 | marC; multiple antibiotic resistance protein                                     |
| K05896 | 3 | 2 | 1 | scpA; segregation and condensation protein A                                     |
| K06199 | 1 | 0 | 1 | crcB, FEX; fluoride exporter                                                     |
| K07126 | 2 | 1 | 1 | K07126; uncharacterized protein                                                  |
| K07152 | 3 | 2 | 1 | SCO1; protein SCO1                                                               |
| K07160 | 2 | 1 | 1 | pxpA; 5-oxoprolinase (ATP-hydrolysing) subunit A [EC:3.5.2.9]                    |
| K07221 | 2 | 1 | 1 | oprO_P; phosphate-selective porin OprO and OprP                                  |
| K07452 | 1 | 0 | 1 | mcrB; 5-methylcytosine-specific restriction enzyme B [EC:3.1.21.-]               |
| K07484 | 1 | 0 | 1 | K07484; transposase                                                              |
| K07488 | 1 | 0 | 1 | K07488; transposase                                                              |
| K07507 | 1 | 0 | 1 | mgtC; putative Mg <sup>2+</sup> transporter-C (MgtC) family protein              |
| K07789 | 3 | 2 | 1 | mdtC; multidrug efflux pump                                                      |
| K08309 | 3 | 2 | 1 | slt; soluble lytic murein transglycosylase [EC:4.2.2.-]                          |
| K08995 | 2 | 1 | 1 | K08995; putative membrane protein                                                |

|        |   |   |   |                                                                                |
|--------|---|---|---|--------------------------------------------------------------------------------|
| K09024 | 3 | 2 | 1 | rutF; flavin reductase [EC:1.5.1.-]                                            |
| K10680 | 2 | 1 | 1 | nemA; N-ethylmaleimide reductase [EC:1.-.-.]                                   |
| K10947 | 1 | 0 | 1 | padR; PadR family transcriptional regulator, regulatory protein PadR           |
| K12203 | 1 | 0 | 1 | dotB, traJ; defect in organelle trafficking protein DotB [EC:7.2.4.8]          |
| K12204 | 1 | 0 | 1 | dotC, traI; defect in organelle trafficking protein DotC                       |
| K12217 | 1 | 0 | 1 | icmO, trbC, dotL; intracellular multiplication protein IcmO [EC:7.2.4.8]       |
| K12218 | 1 | 0 | 1 | icmP, trbA; intracellular multiplication protein IcmP                          |
| K13993 | 1 | 0 | 1 | HSP20; HSP20 family protein                                                    |
| K16092 | 2 | 1 | 1 | btuB; vitamin B12 transporter                                                  |
| K16147 | 1 | 0 | 1 | glgE; starch synthase (maltosyl-transferring) [EC:2.4.99.16]                   |
| K18843 | 1 | 0 | 1 | hicB; antitoxin HicB                                                           |
| K18928 | 2 | 1 | 1 | lldE; L-lactate dehydrogenase complex protein LldE                             |
| K18929 | 2 | 1 | 1 | lldF; L-lactate dehydrogenase complex protein LldF                             |
| K18954 | 1 | 0 | 1 | pobR; AraC family transcriptional regulator, transcriptional activator of pobA |
| K19147 | 1 | 0 | 1 | mcrC; 5-methylcytosine-specific restriction enzyme subunit McrC                |
| K19837 | 1 | 0 | 1 | atzE; 1-carboxybiuret hydrolase [EC:3.5.1.131]                                 |
| K21495 | 1 | 0 | 1 | fitA; antitoxin FitA                                                           |
| K22473 | 2 | 1 | 1 | adhA; alcohol dehydrogenase (quinone), dehydrogenase subunit [EC:1.1.5.5]      |
| K22895 | 4 | 3 | 1 | cruH; renierapurpurin 18,18'-hydroxylase                                       |
| K23124 | 2 | 1 | 1 | pxpC; 5-oxoprolinase (ATP-hydrolysing) subunit C [EC:3.5.2.9]                  |

**Table S5.** KOs underrepresented in the *G. entanii* species when compared to all other *Novacetimonas* species. Values in the table correspond to median gene/KO copy number values.

| ID     | <i>G. entanii</i><br>(n=9) | <i>Novacetimonas</i><br>spp.<br>(n=15) | Difference | Definition                                                                                         |
|--------|----------------------------|----------------------------------------|------------|----------------------------------------------------------------------------------------------------|
| K02014 | 24                         | 29                                     | -5         | TC.FEV.OM; iron complex outermembrane receptor protein                                             |
| K00059 | 3                          | 5                                      | -2         | fabG, OAR1; 3-oxoacyl-[acyl-carrier protein] reductase [EC:1.1.1.100]                              |
| K02433 | 2                          | 4                                      | -2         | gatA, QRSL1; aspartyl-tRNA(Asn)/glutamyl-tRNA(Gln) amidotransferase subunit A [EC:6.3.5.6 6.3.5.7] |
| K13771 | 3                          | 5                                      | -2         | nsrR; Rrf2 family transcriptional regulator, nitric oxide-sensitive transcriptional repressor      |
| K00027 | 1                          | 2                                      | -1         | ME2, sfcA, maeA; malate dehydrogenase (oxaloacetate-decarboxylating) [EC:1.1.1.38]                 |

|        |   |   |    |                                                                                                |
|--------|---|---|----|------------------------------------------------------------------------------------------------|
| K00117 | 2 | 3 | -1 | gcd; quinoprotein glucose dehydrogenase [EC:1.1.5.2]                                           |
| K00459 | 1 | 2 | -1 | ncd2, npd; nitronate monooxygenase [EC:1.13.12.16]                                             |
| K00694 | 2 | 3 | -1 | bcsA; cellulose synthase (UDP-forming) [EC:2.4.1.12]                                           |
| K00799 | 3 | 4 | -1 | GST, gst; glutathione S-transferase [EC:2.5.1.18]                                              |
| K00820 | 1 | 2 | -1 | glms, GFPT; glutamine---fructose-6-phosphate transaminase (isomerizing) [EC:2.6.1.16]          |
| K01114 | 1 | 2 | -1 | plc; phospholipase C [EC:3.1.4.3]                                                              |
| K01214 | 1 | 2 | -1 | ISA, treX; isoamylase [EC:3.2.1.68]                                                            |
| K01465 | 2 | 3 | -1 | URA4, pyrC; dihydroorotase [EC:3.5.2.3]                                                        |
| K01652 | 2 | 3 | -1 | E2.2.1.6L, ilvB, ilvG, ilvI; acetolactate synthase I/II/III large subunit [EC:2.2.1.6]         |
| K01714 | 1 | 2 | -1 | dapA; 4-hydroxy-tetrahydrodipicolinate synthase [EC:4.3.3.7]                                   |
| K01733 | 1 | 2 | -1 | thrC; threonine synthase [EC:4.2.3.1]                                                          |
| K02483 | 5 | 6 | -1 | K02483; two-component system, OmpR family, response regulator                                  |
| K03307 | 2 | 3 | -1 | TC.SSS; solute:Na <sup>+</sup> symporter, SSS family                                           |
| K03457 | 1 | 2 | -1 | TC.NCS1; nucleobase:cation symporter-1, NCS1 family                                            |
| K03466 | 1 | 2 | -1 | ftsK, spoIIIE; DNA segregation ATPase FtsK/SpoIIIE, S-DNA-T family                             |
| K03566 | 1 | 2 | -1 | gcvA; LysR family transcriptional regulator, glycine cleavage system transcriptional activator |
| K03585 | 1 | 2 | -1 | acrA, mexA, adel, smeD, mtrC, cmeA; membrane fusion protein, multidrug efflux system           |
| K04091 | 1 | 2 | -1 | ssuD, msuD; alkanesulfonate monooxygenase [EC:1.14.14.5 1.14.14.34]                            |
| K06221 | 1 | 2 | -1 | dkgA; 2,5-diketo-D-gluconate reductase A [EC:1.1.1.346]                                        |
| K07552 | 2 | 3 | -1 | bcr, tcaB; MFS transporter, DHA1 family, multidrug resistance protein                          |
| K12373 | 2 | 3 | -1 | HEXA_B; hexosaminidase [EC:3.2.1.52]                                                           |
| K15553 | 2 | 3 | -1 | ssuA; sulfonate transport system substrate-binding protein                                     |
| K15554 | 2 | 3 | -1 | ssuC; sulfonate transport system permease protein                                              |
| K15555 | 2 | 3 | -1 | ssuB; sulfonate transport system ATP-binding protein [EC:7.6.2.14]                             |
| K18903 | 1 | 2 | -1 | oprC, opcM; outer membrane protein, multidrug efflux system                                    |
| K22474 | 2 | 3 | -1 | adhB; alcohol dehydrogenase (quinone), cytochrome c subunit [EC:1.1.5.5]                       |
| K22736 | 1 | 2 | -1 | VIT; vacuolar iron transporter family protein                                                  |

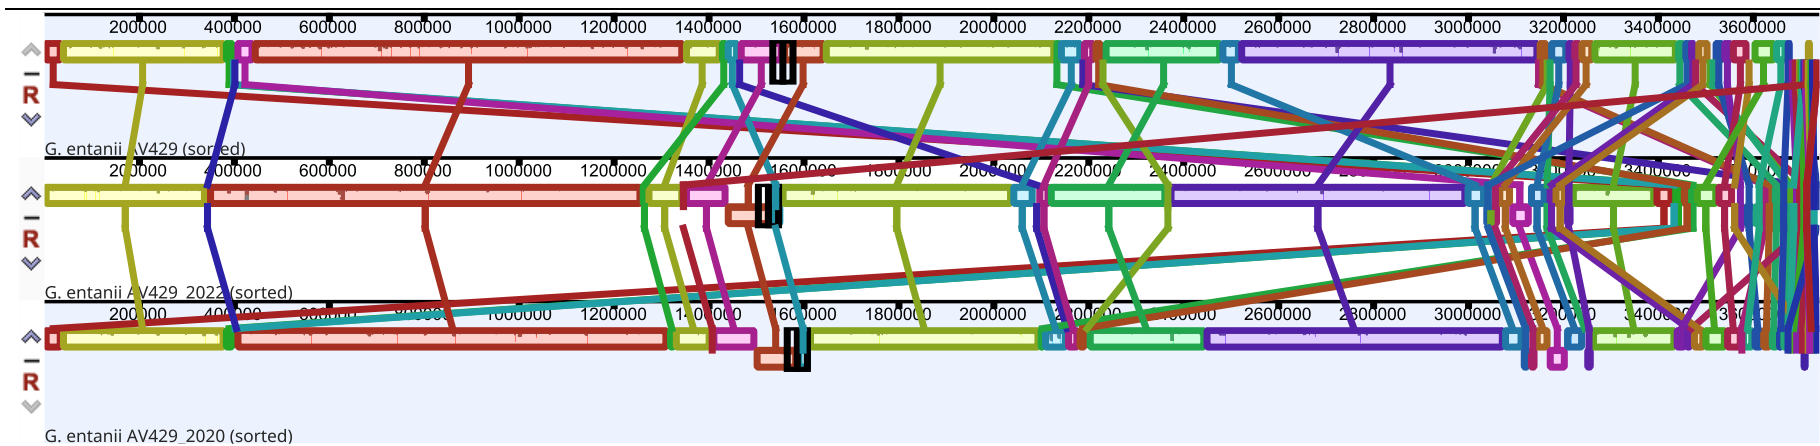

**Figure S1.** Aligned draft bacterial genomes of *G. entanii* AV429, *G. entanii* AV429-2020 and *G. entanii* AV429-2022 by Mauve. Each of the draft genome sequences was at the beginning aligned to a reference chromosome sequence *Novacetimonas hansenii* C110 (acc. no. CP062147). The matches are partitioned into a minimum set of collinear blocks. Each sequence of identically colored blocks represents a collinear set of matching regions. One connecting line is drawn per collinear block.
